# Supplementary material for: An ESIPT-based ratiometric fluorescent probe for the imaging of nitroxyl in living cells
Source: Royal Society of Chemistry journal article supplement (doi:10.1039/c5ay00531k), 2015-01-01
Supplement: c5ay00531k1.pdf [file c5ay00531k1.pdf]

## Electronic Supplementary Information

### An ESIPT-based ratiometric fluorescent probe for the imaging of nitroxyl in living cells

Hao-Ming Lv,<sup>a</sup> Yi Chen,<sup>b</sup> Jian Lei,<sup>a</sup> Chak-Tong Au,<sup>a</sup> Shuang-Feng Yin,<sup>\*a</sup>

*<sup>a</sup>State Key Laboratory of Chemo/Biosensing and Chemometrics, College of Chemistry  
and Chemical Engineering, Hunan University, Changsha 410082, China*

*<sup>b</sup>Medical College, Hunan University of Chinese Medicine, Changsha 410208, China*

*\* Corresponding author. Tel.: +86-731-88821171; Fax: +86-731-88821171;*

*E-mail address: sf\_yin@hnu.edu.cn (Prof. Dr. S.F. Yin).*

|                                                                             | Page   |
|-----------------------------------------------------------------------------|--------|
| 1. The method for the statistical analysis in MTT assay.....                | S2     |
| 2. The method for administration of the probe for cellular experiments..... | S3     |
| 3. Figs. S1–S6.....                                                         | S4–S6  |
| 4. Figs. S7–S13.....                                                        | S7–S10 |

### The method for the statistical analysis in MTT assay

All data were obtained from at least three separate experiments and the results were expressed as mean±S.D. Data were analyzed for statistical significance by one-way ANOVA, and pb0.05 was considered statistically for the indication of significant difference. The IC<sub>50</sub> values were obtained through the Probit regression model between inhibition ratio and concentration. There are five concentration gradients and each concentration gradient corresponds to one inhibition ratio. A fitting line Y=A+BX is gained, plotted by log(concentration) on the horizontal axis and probit of inhibition ratio on the vertical axis. Then log(IC<sub>50</sub>) is got by calculaing the value of X when Y is half of probit of inhibition ratio. Next, we can get the value of IC<sub>50</sub> by log(IC<sub>50</sub>). We need to get three values of IC<sub>50</sub>, and then calculate the mean and standard deviation.

Equation:

$$IC_{50_{Average}} = \frac{(IC_{50_A} + IC_{50_B} + IC_{50_C})}{3}$$

$$\text{Standard deviation} = \left\{ \frac{[(IC_{50_A} - IC_{50_{Average}})^2 + (IC_{50_B} - IC_{50_{Average}})^2 + (IC_{50_C} - IC_{50_{Average}})^2]}{3} \right\}^{0.5}$$

### **The method for administration of the probe for cellular experiments**

HeLa cells were seeded in a 96-well plate in culture media and allowed to adhere for 24 h. The culture medium was then removed, and the cells were washed once with 1 mL of phosphate-buffered saline (PBS). HeLa cells were placed in 1 mL of PBS and were incubated with 5  $\mu$ M probe **1** (Stock solution of probe was prepared by dissolving probe **1** in DMSO) for 30 min at 37 °C. After washing the cells three times with PBS to remove the excess probe, the cells were placed in 1 mL of PBS and treated with 100  $\mu$ M AS for 20 min. Finally, the cells were carefully washed three times with PBS and mounted on the microscope. The fluorescence images were recorded with a Leica TCS SP5 II Confocal Laser Scanning Microscope.

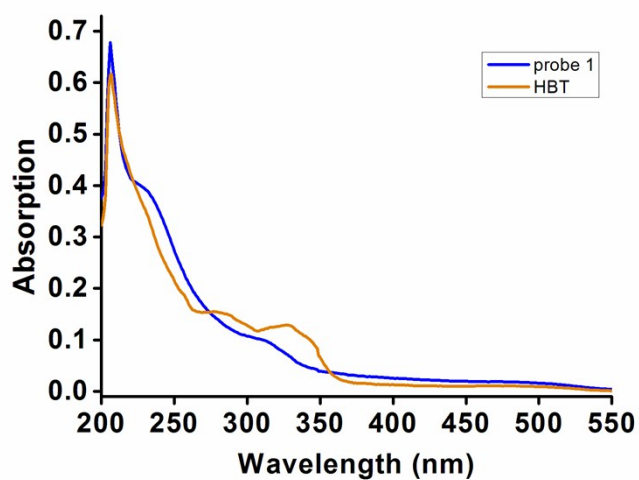

**Fig. S1** Absorption spectra of free probe **1** (10  $\mu$ M) and the reference **HBT** (10  $\mu$ M).

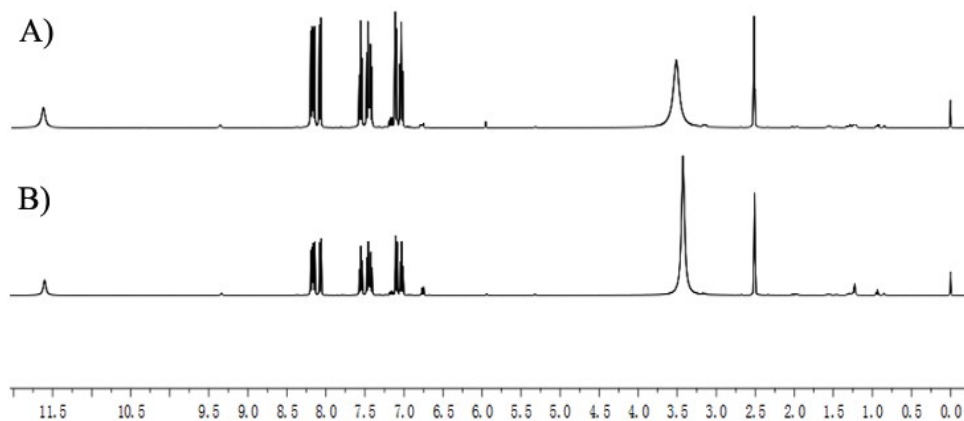

**Fig. S2**  $^1\text{H}$  NMR spectra of (A) the standard **HBT** and (B) isolated product of probe **1** with HNO in  $d_6$ -DMSO.

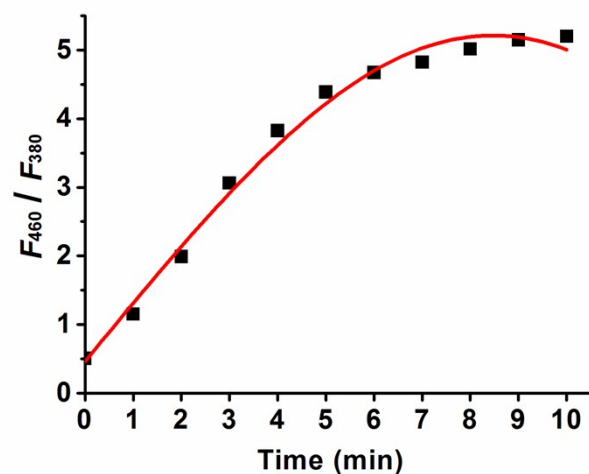

**Fig. S3** Change of  $F_{460}/F_{380}$  of probe **1** (2  $\mu\text{M}$ ) towards AS (15  $\mu\text{M}$ ) with time (from 0 to 10 min).

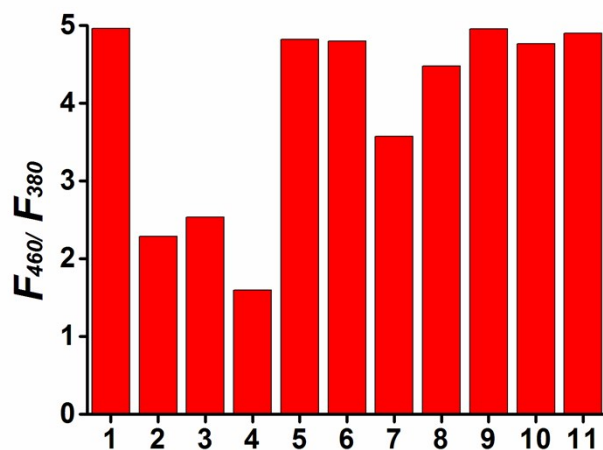

**Fig. S4** Fluorescence responses of probe **1** (2  $\mu\text{M}$ ) to testing species (1 mM) in the presence of AS (20  $\mu\text{M}$ ): 1, just AS; 2,  $\text{Na}_2\text{S}$ ; 3, Cys; 4, GSH; 5,  $\text{H}_2\text{O}_2$ ; 6,  $\text{K}^+$ ; 7,  $\text{Fe}^{3+}$ ; 8, NO; 9,  $\text{NO}_2^-$ ; 10,  $\text{KO}_2$ ; and 11,  $\text{Na}^+$ .

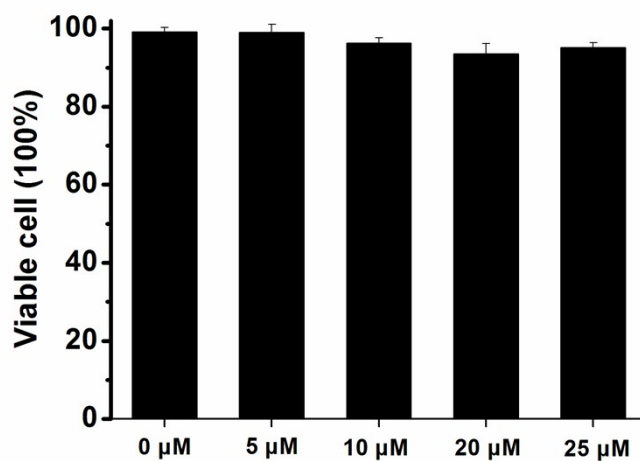

**Fig. S5** HeLa cytotoxicity assays at different concentrations of probe **1**.

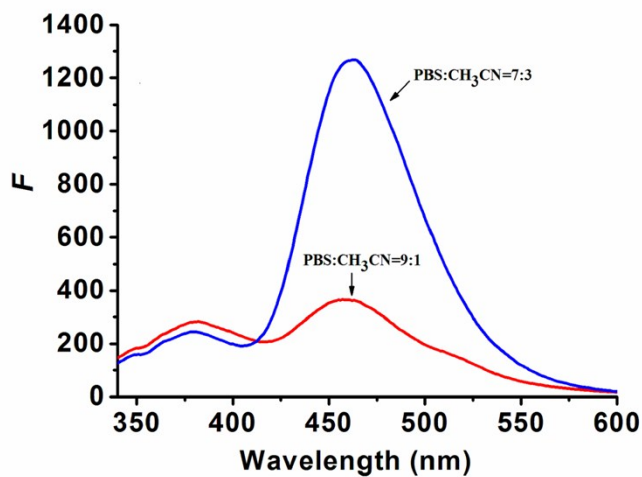

**Fig. S6** Fluorescence response ( $F$ ) of probe **1** (2  $\mu$ M) in pH 7.4 PBS buffer/CH<sub>3</sub>CN (7:3, v/v) in the presence of AS (30  $\mu$ M) and Fluorescence response ( $F$ ) of probe **1** (2  $\mu$ M) in pH 7.4 PBS buffer/CH<sub>3</sub>CN (9:1, v/v) in the presence of AS (30  $\mu$ M).

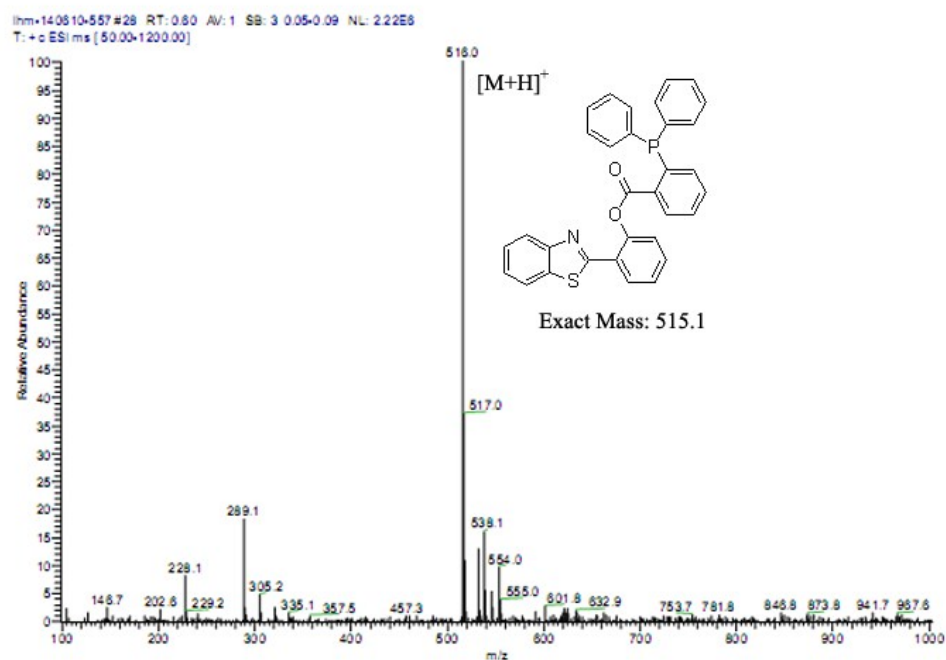

Fig. S7 ESI-MS spectrum of probe 1.

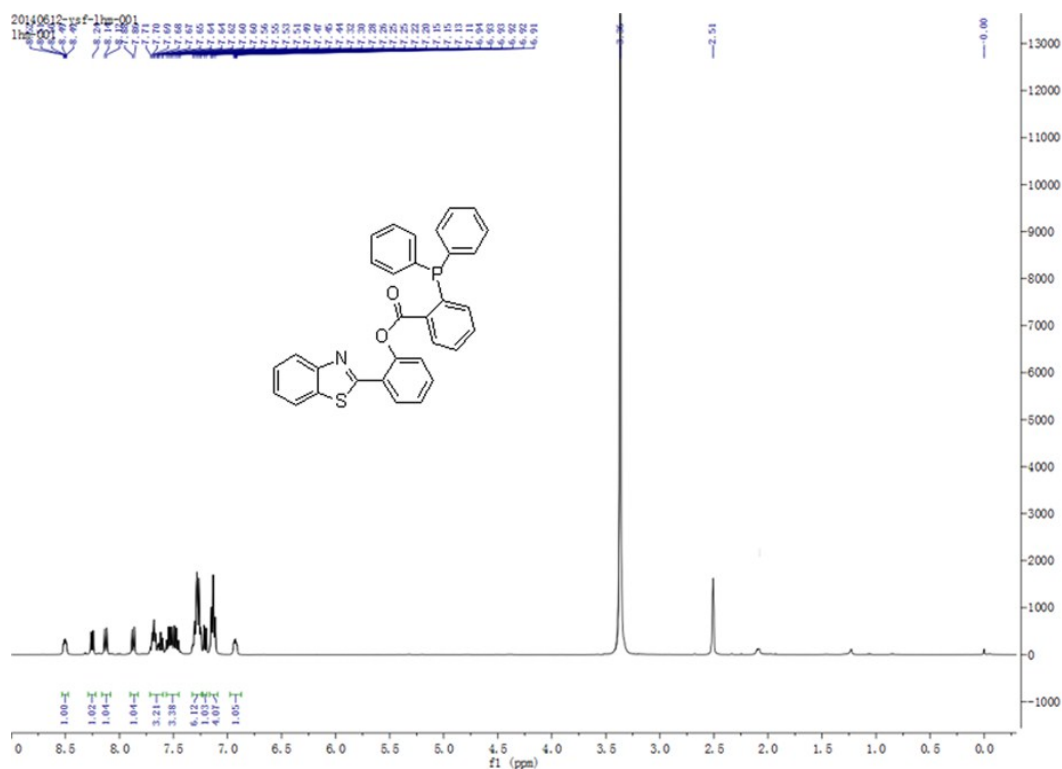

Fig. S8  $^1\text{H}$  NMR spectrum of probe 1 in  $d_6$ -DMSO.

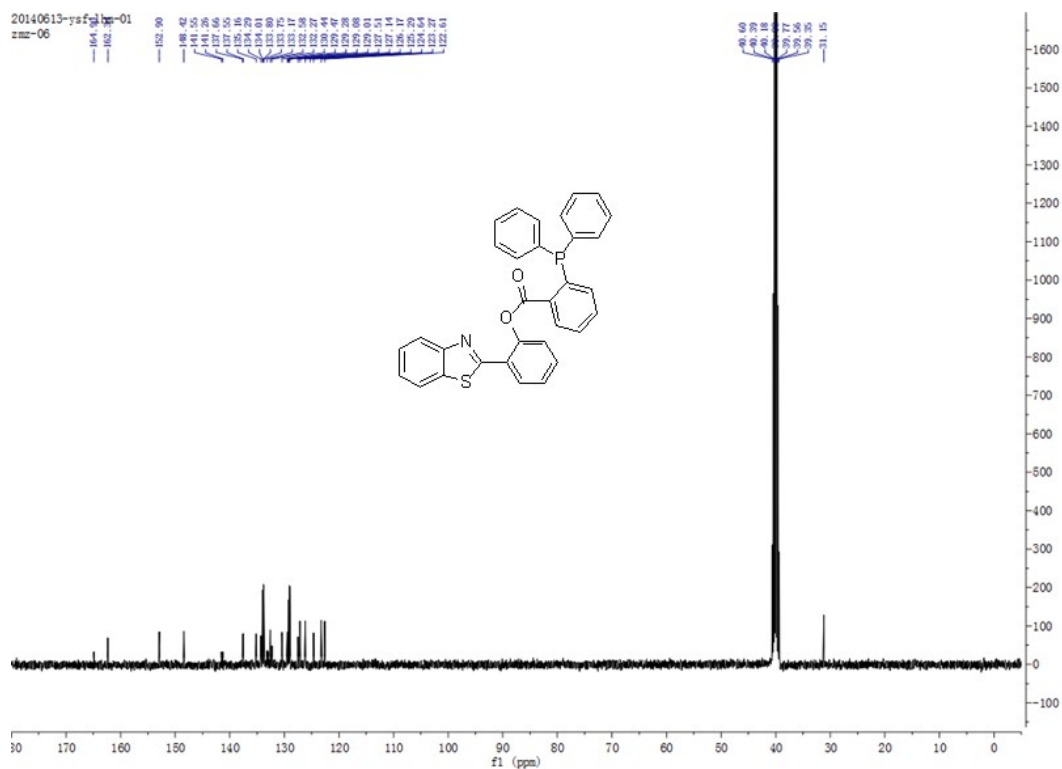

**Fig. S9**  $^{13}\text{C}$  NMR spectrum of probe **1** in  $d_6$ -DMSO.

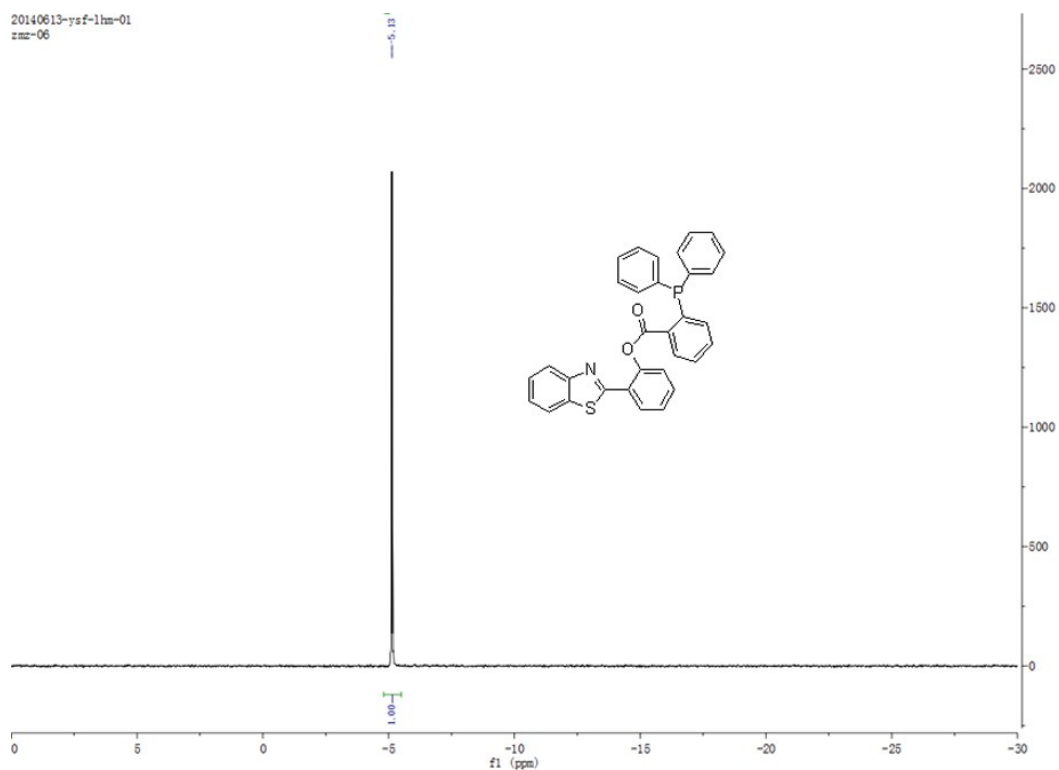

**Fig. S10**  $^{31}\text{P}$  NMR spectrum of probe **1** in  $d_6$ -DMSO.



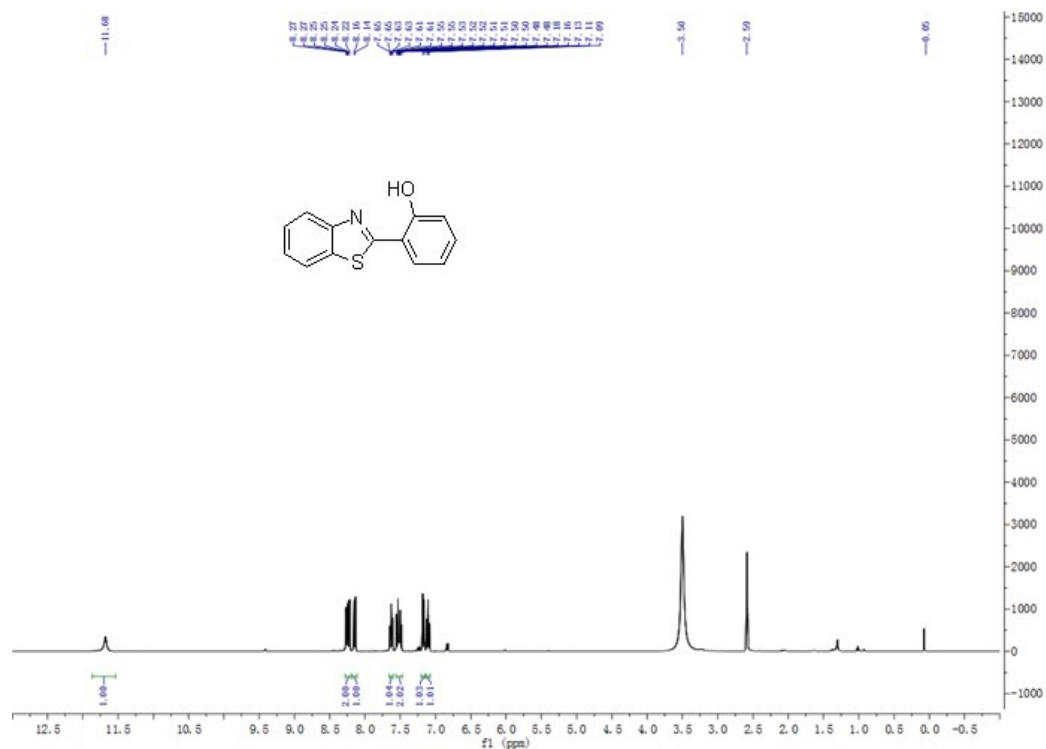

**Fig. S11**  $^1\text{H}$  NMR spectrum of the isolated product of probe **1** with HNO in  $d_6$ -DMSO.

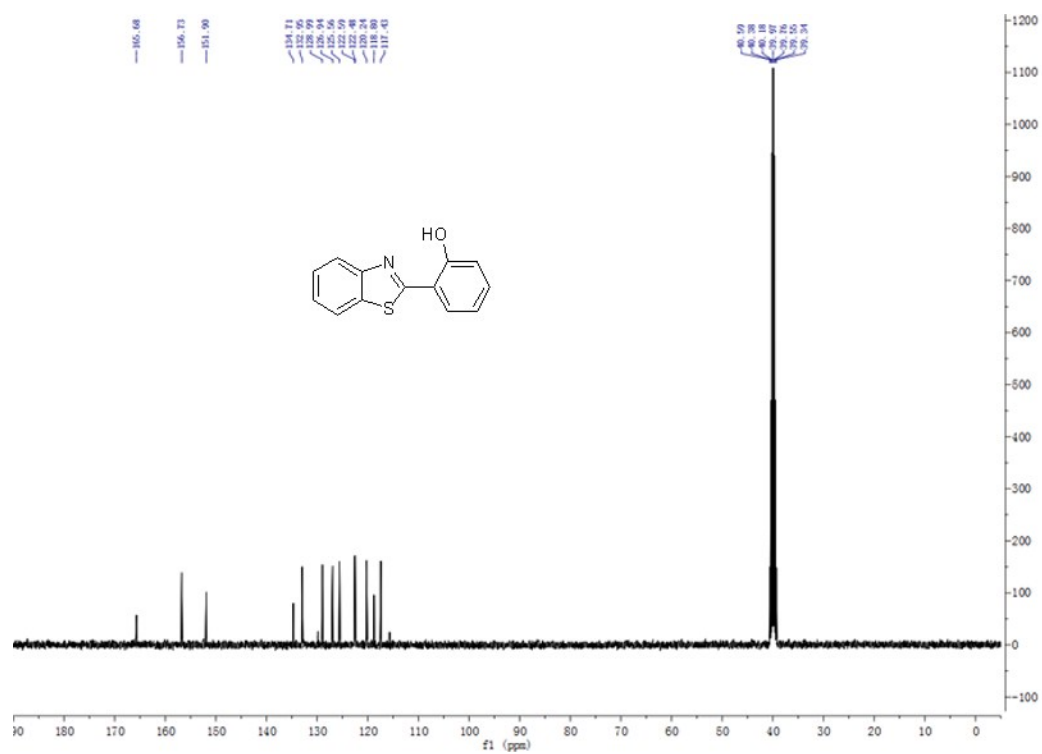

**Fig. S12**  $^{13}\text{C}$  NMR spectrum of the isolated product of probe **1** with HNO in  $d_6$ -DMSO.

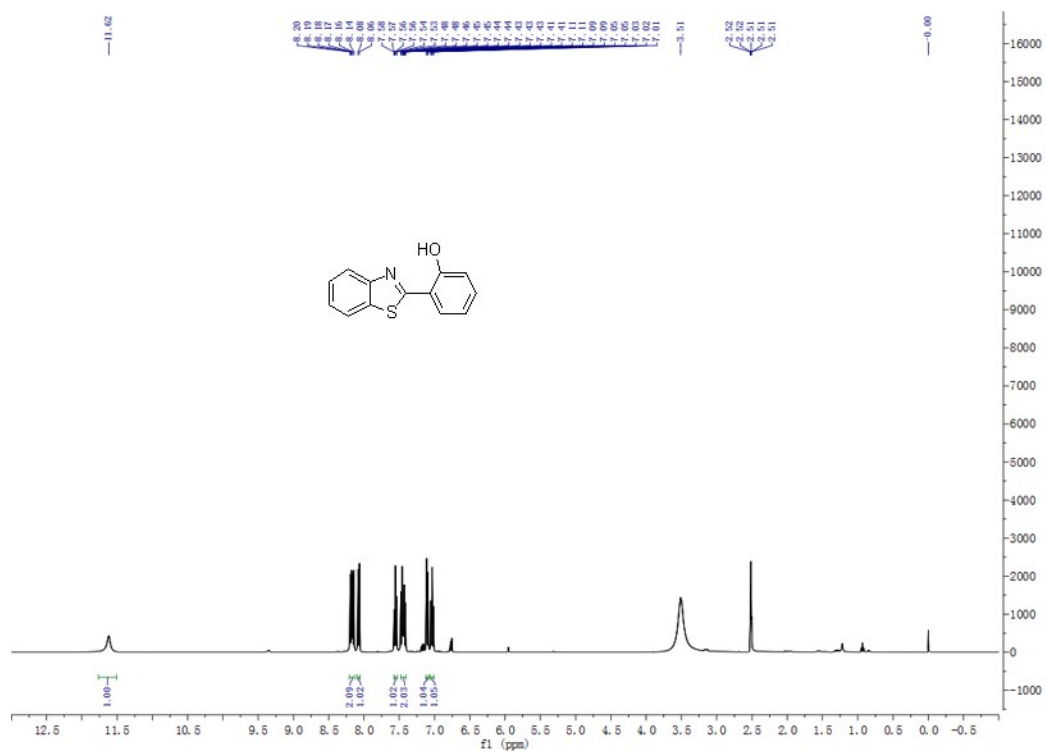

**Fig. S13**  $^1\text{H}$  NMR spectrum of **HBT** in  $d_6$ -DMSO.
